# Supplementary material for: Inferring selection in the Anopheles gambiae species complex: an example from immune-related serine protease inhibitors
Source: Springer Nature journal article supplement (doi:10.1186/1475-2875-8-117), 2009-06-04
Supplement: Additional file 2 [file 1475-2875-8-117-s2.doc]

Supplementary Figure S1: Correlations in genetic diversity between species
